# Supplementary material for: Topological insulating states in 2D transition metal dichalcogenides induced by defects and strain
Source: Royal Society of Chemistry journal article supplement (doi:10.1039/c6nr07851f), 2016-12-01
Supplement: c6nr07851f1.pdf [file c6nr07851f1.pdf]

Supplementary Information for  
**Topological insulating states in 2D transition metal dichalcogenides  
induced by defects and strain**

Xiaoyin Li,<sup>a, b, c</sup> Shunhong Zhang,<sup>a</sup> and Qian Wang\*<sup>a, b, c</sup>

<sup>a</sup> Center for Applied Physics and Technology, College of Engineering, Peking University; Key Laboratory of High Energy Density Physics Simulation, Ministry of Education, Beijing 100871, China.

<sup>b</sup> Department of Materials Science and Engineering, College of Engineering, Peking University, Beijing 100871, China.

<sup>c</sup> Collaborative Innovation Center of IFSA (CICIFSA), Shanghai Jiao Tong University, Shanghai 200240, China.

**Contents**

**Supplementary Figures**

**Figure S1.** Optimized structures of 2D MoS<sub>2</sub> polymorphs.

**Figure S2.** NpT-AIMD simulation results of sho-MoS<sub>2</sub>.

**Figure S3.** MLWFs of sho-MoS<sub>2</sub>.

**Figure S4.** Band structure evolution of sho-MoS<sub>2</sub> under equi-biaxial tensile strain.

**Figure S5.** Orbital projected band structure of sho-MoS<sub>2</sub> under equi-biaxial tensile strain.

**Figure S6.** Band structure of sho-TMD, and band gap of sho-MoSe<sub>2</sub> and sho-WS<sub>2</sub> under strain.

**Figure S7.** Band structure evolution of sho-MoSe<sub>2</sub> and sho-WS<sub>2</sub> under equi-biaxial tensile strain.

**Figure S8.** Optimized structures of sh<sup>n</sup>o-MoS<sub>2</sub> ( $n = 2-6$ ).

**Figure S9.** Electronic band structure of sh<sup>n</sup>o-MoS<sub>2</sub> ( $n = 1-6$ ).

**Figure S10.** Density of states of sh<sup>n</sup>o-MoS<sub>2</sub> ( $n = 1-6$ ).

**Figure S11.** Band-decomposed charge density of sh<sup>n</sup>o-MoS<sub>2</sub> ( $n = 1-5$ ).

**Supplementary Tables**

**Table S1.** Structural parameters and band gap of sho-TMD.

**Table S2.** Structural parameters, total energy, and band gap of sh<sup>n</sup>o-MoS<sub>2</sub> ( $n = 1-6$ ).

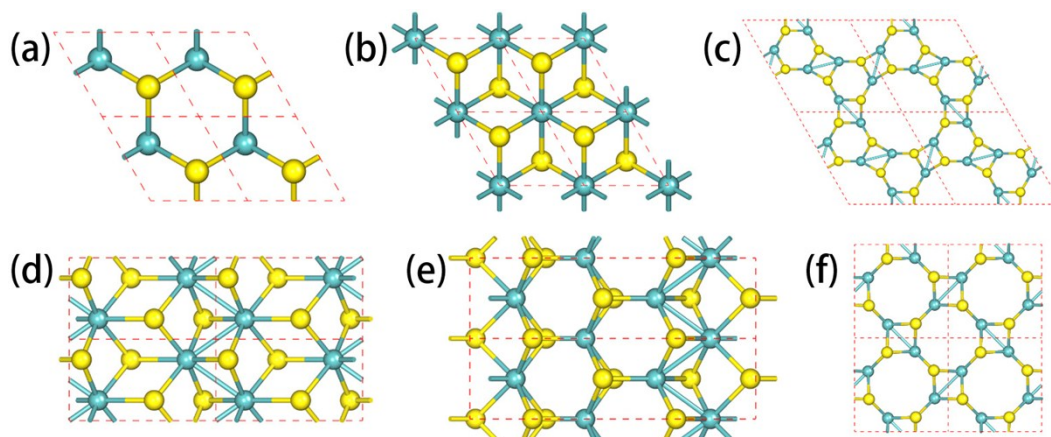

**Figure S1.** Optimized structures of (a) H-MoS<sub>2</sub>, (b) 1T-MoS<sub>2</sub>, (c) H'-MoS<sub>2</sub>, (d) 1T'-MoS<sub>2</sub>, (e) T''-MoS<sub>2</sub> and (f) so-MoS<sub>2</sub>.

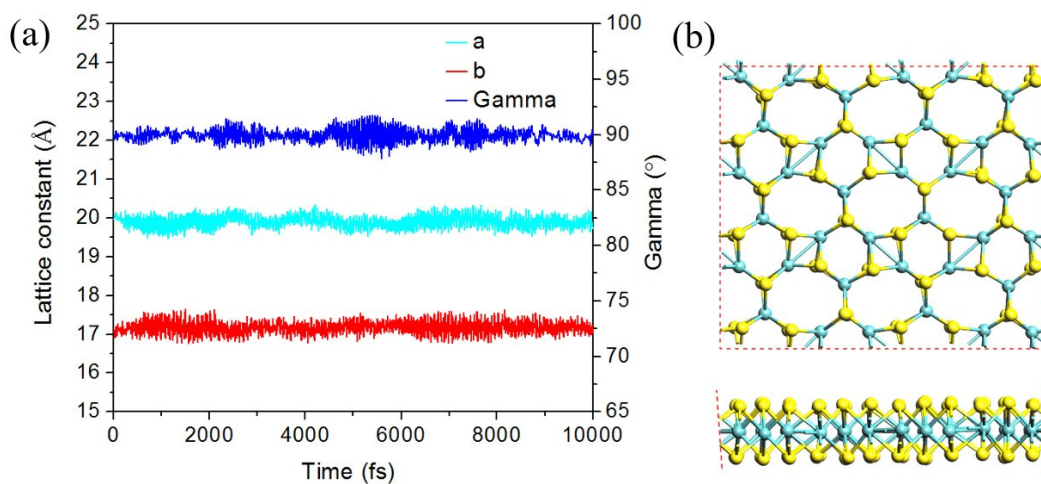

**Figure S2.** (a) Evolution of lattice parameters  $a$ ,  $b$ , and  $\gamma$  of sho-MoS<sub>2</sub> during the NpT-AIMD simulation at temperature of 300 K. (b) Snapshots of the structure ( $2 \times 3$  supercell) at the end of the simulation.

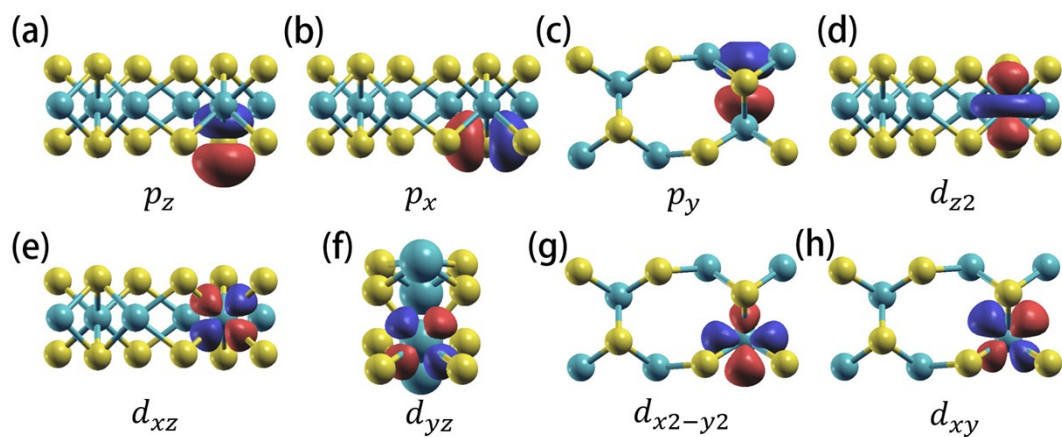

**Figure S3.** Maximally Localized Wannier functions (MLWFs) of sho-MoS<sub>2</sub>, including three S-3*p* orbitals and five Mo-4*d* orbitals.

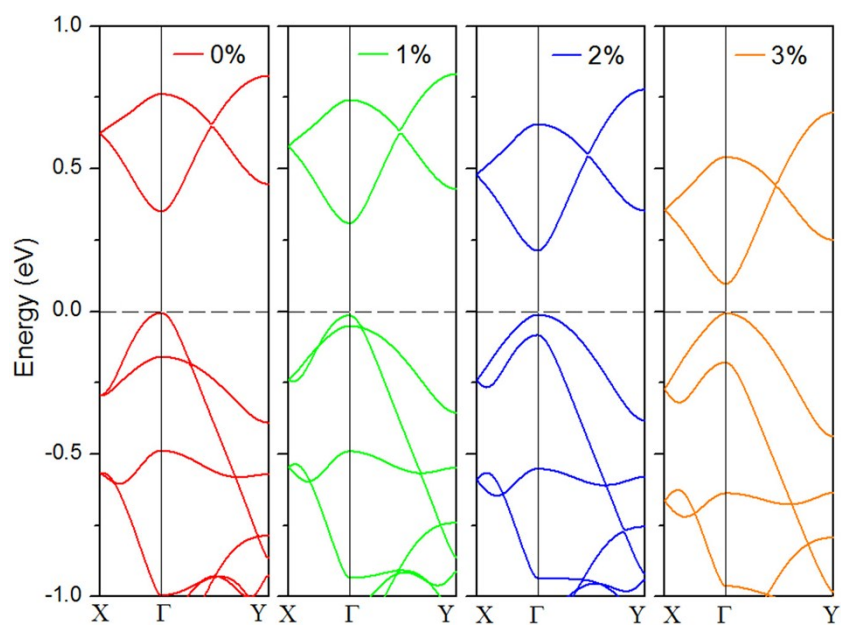

**Figure S4.** Electronic band structure of sho-MoS<sub>2</sub> under different magnitudes of equibiaxial tensile strain at the PBE level.

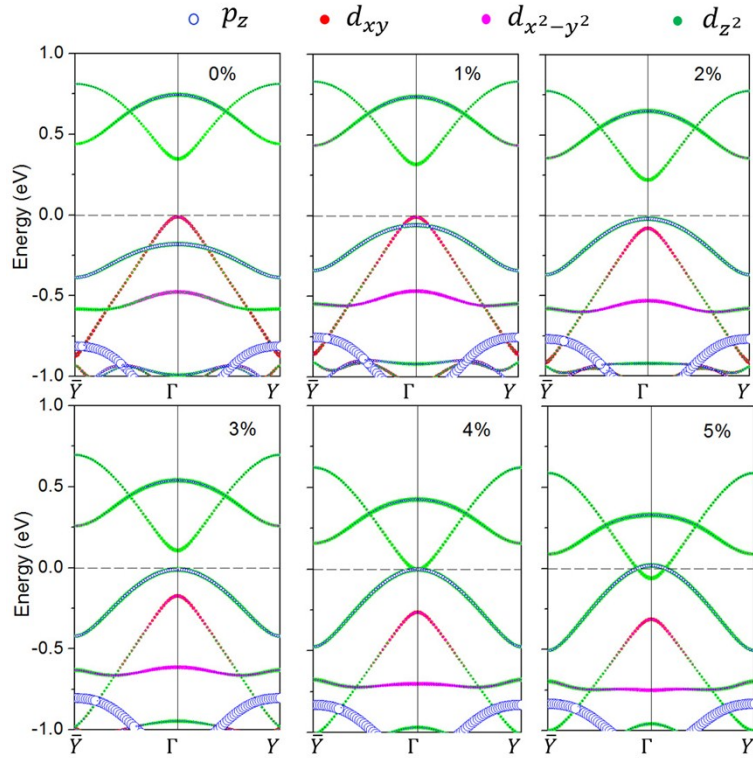

**Figure S5.** Orbital projected band structure of sho-MoS<sub>2</sub> under different magnitudes of equi-biaxial tensile strains.

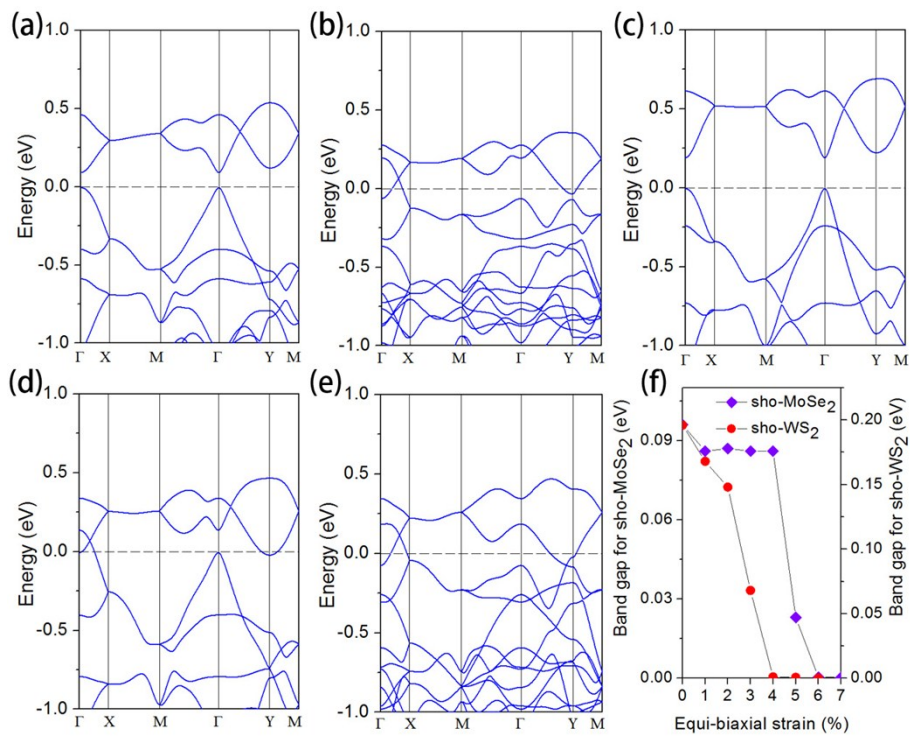

**Figure S6.** Electronic band structure of (a) sho-MoSe<sub>2</sub>, (b) sho-MoTe<sub>2</sub>, (c) sho-WS<sub>2</sub>, (d) sho-WSe<sub>2</sub>, and (e) sho-WTe<sub>2</sub> calculated using the PBE functional. (f) Energy band

gap as a function of equi-biaxial tensile strain for sho-MoSe<sub>2</sub> and sho-WS<sub>2</sub>, respectively.

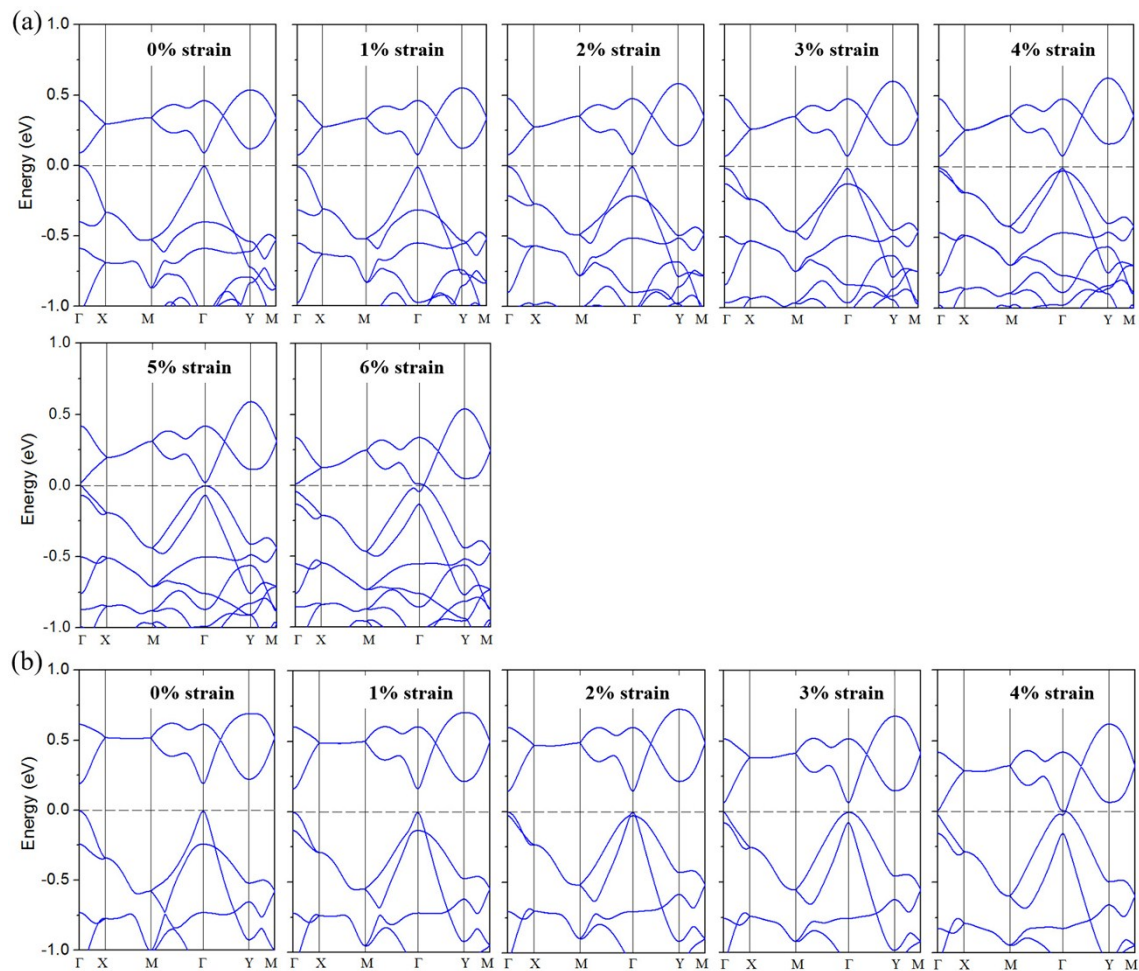

**Figure S7.** Electronic band structure of (a) sho-MoSe<sub>2</sub> and (b) sho-WS<sub>2</sub> under different magnitudes of equi-biaxial tensile strain (at the PBE level).

**Table S1.** Optimized lattice parameters and electronic band gaps  $E_g$  at the PBE level for sho- $MX_2$  structures, where  $M = \text{Mo}$  and  $\text{W}$ , and  $X = \text{S}$ ,  $\text{Se}$  and  $\text{Te}$ .

| sho- $MX_2$       | $a$ (Å) | $b$ (Å) | $E_g$ (eV) |
|-------------------|---------|---------|------------|
| MoS <sub>2</sub>  | 9.98    | 5.70    | 0.35       |
| MoSe <sub>2</sub> | 10.41   | 5.92    | 0.10       |
| MoTe <sub>2</sub> | 11.12   | 6.18    | metallic   |
| WS <sub>2</sub>   | 10.02   | 5.73    | 0.20       |
| WSe <sub>2</sub>  | 10.42   | 5.92    | metallic   |
| WTe <sub>2</sub>  | 11.08   | 6.18    | metallic   |

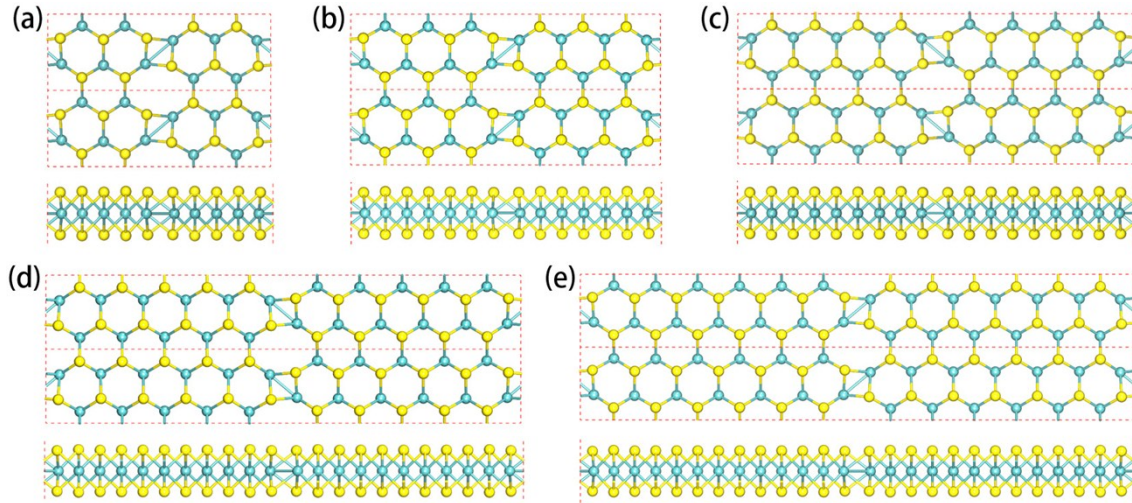

**Figure S8.** Optimized structures of (a) sh<sup>2</sup>o-MoS<sub>2</sub>, (b) sh<sup>3</sup>o-MoS<sub>2</sub>, (c) sh<sup>4</sup>o-MoS<sub>2</sub>, (d) sh<sup>5</sup>o-MoS<sub>2</sub>, and (e) sh<sup>6</sup>o-MoS<sub>2</sub> from the top and side views.

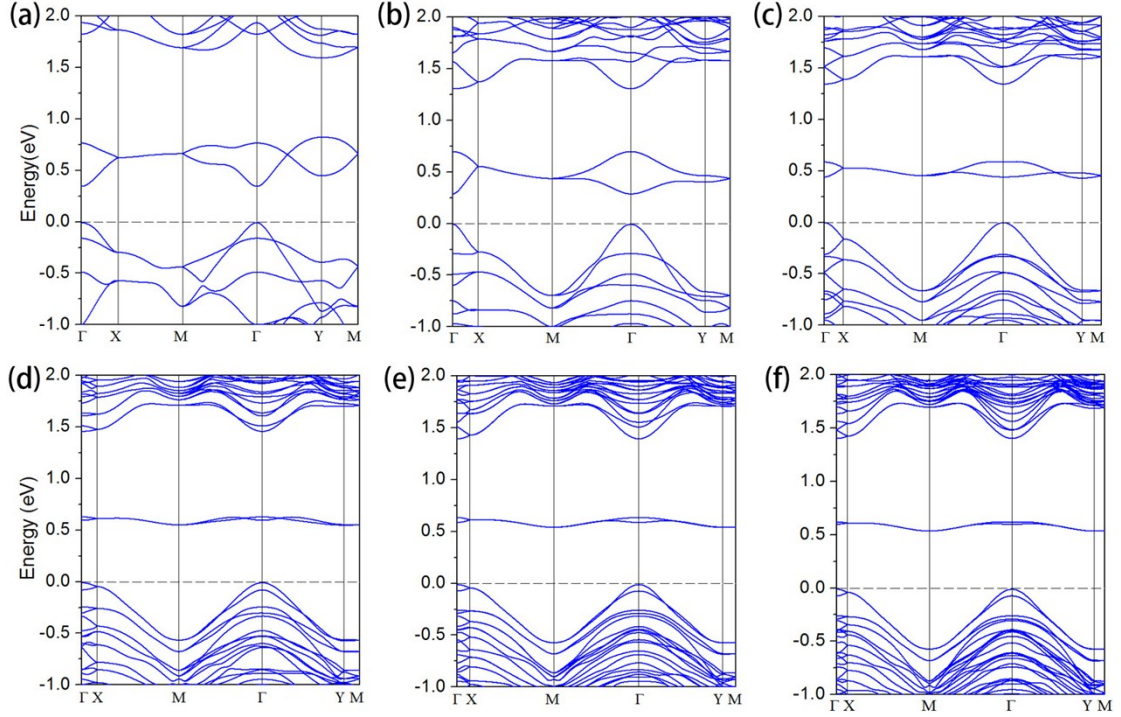

**Figure S9.** Electronic band structure of (a) sho-MoS<sub>2</sub>, (b) sh<sup>2</sup>o-MoS<sub>2</sub>, (c) sh<sup>3</sup>o-MoS<sub>2</sub>, (d) sh<sup>4</sup>o-MoS<sub>2</sub>, (e) sh<sup>5</sup>o-MoS<sub>2</sub>, and (f) sh<sup>6</sup>o-MoS<sub>2</sub> at the PBE level.

From the results in Table S2, one can see that the band gaps of sh<sup>n</sup>o-MoS<sub>2</sub> structures increase as the value of  $n$  increases except for the case of  $n = 1$ . This can be attributed to the structure uniqueness of sho-MoS<sub>2</sub>. It is found that the charge is mainly distributed in the octagon rings by calculating band-decomposed charge density corresponding to the two lowest unoccupied bands of sh<sup>n</sup>o-MoS<sub>2</sub>. For sh<sup>n</sup>o-MoS<sub>2</sub> with  $n$  value larger than 1, where the neighboring octagons are separated by hexagons along the crystal axis  $a$ , so that suppressing the interaction of localized charge in two neighboring octagons. However, for sho-structure, there is no hexagon unit between the neighboring octagonal rings along the crystal axis  $a$ , thus the charge localized in the neighboring octagons can directly interact with each other, resulting in the abnormal value of band gap.

**Table S2.** Optimized lattice parameters, relative energy ( $E$ ) calculated with respect to H-MoS<sub>2</sub>, and band gap ( $E_g$ , calculated by using the PBE functional) for sh<sup>*n*</sup>o-MoS<sub>2</sub> ( $n=1-6$ ).

| $n$ in sh <sup><i>n</i></sup> o-MoS <sub>2</sub> | $a$ (Å) | $b$ (Å) | $E$ (eV/f.u.) | $E_g$ (eV) |
|--------------------------------------------------|---------|---------|---------------|------------|
| 1                                                | 9.98    | 5.70    | 0.60          | 0.35       |
| 2                                                | 16.40   | 5.60    | 0.37          | 0.29       |
| 3                                                | 22.80   | 5.56    | 0.27          | 0.43       |
| 4                                                | 29.18   | 5.55    | 0.21          | 0.56       |
| 5                                                | 35.54   | 5.54    | 0.17          | 0.55       |
| 6                                                | 41.91   | 5.54    | 0.15          | 0.55       |

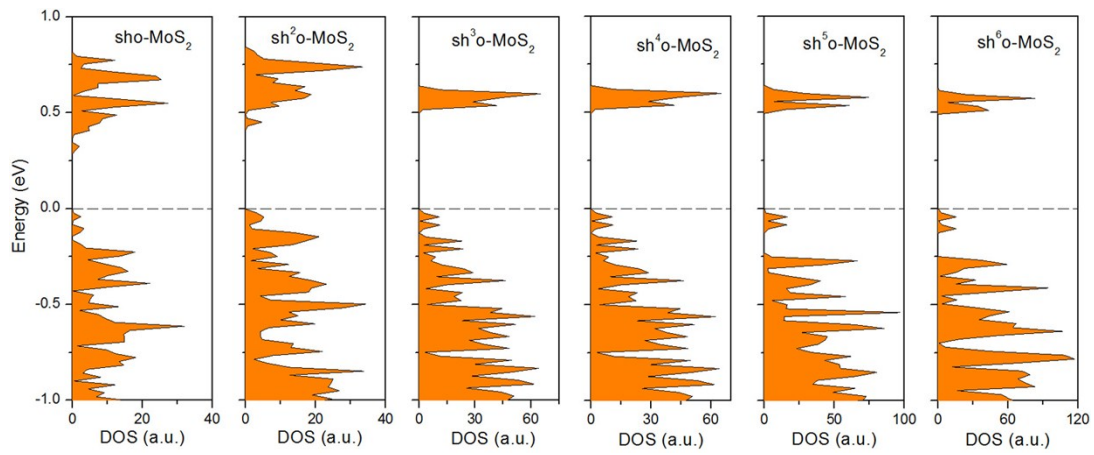

**Figure S10.** Electronic density of states (DOS) of sh<sup>0</sup>o-, sh<sup>2</sup>o-, sh<sup>3</sup>o-, sh<sup>4</sup>o-, sh<sup>5</sup>o-, and sh<sup>6</sup>o-MoS<sub>2</sub>. Here a.u. represents arbitrary unit.



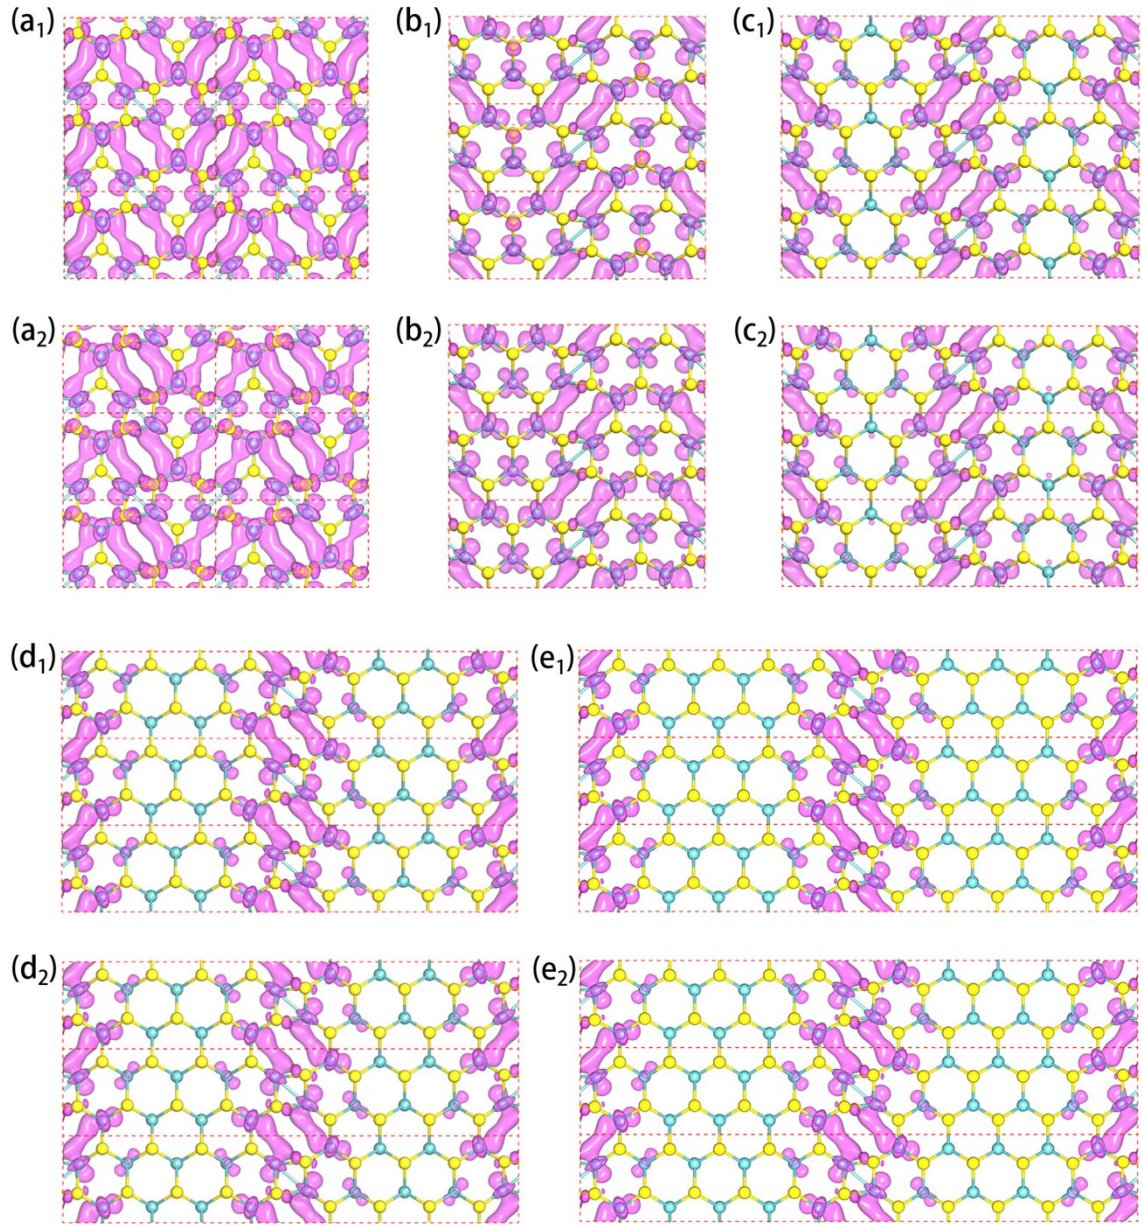

**Figure S11.** Band-decomposed charge density isosurfaces (isovalue:  $0.01 e/\text{\AA}^3$ ) corresponding to the lowest and the second lowest unoccupied energy bands of  $sh^n$ - $\text{MoS}_2$ : (a<sub>1</sub>) and (a<sub>2</sub>) for  $sh^0$ - $\text{MoS}_2$ ; (b<sub>1</sub>) and (b<sub>2</sub>) for  $sh^2$ - $\text{MoS}_2$ ; (c<sub>1</sub>) and (c<sub>2</sub>) for  $sh^3$ - $\text{MoS}_2$ ; (d<sub>1</sub>) and (d<sub>2</sub>) for  $sh^4$ - $\text{MoS}_2$ ; (e<sub>1</sub>) and (e<sub>2</sub>) for  $sh^5$ - $\text{MoS}_2$ . The top and bottom panels are the charge of the lowest and second lowest unoccupied bands, respectively.
